# Supplementary material
Source: PubMed Central journal article supplement (PMC8013086)
Supplement: 2330_materials.pdf [file 2330_materials.pdf]

**On-line Table: MNI coordinates of 64 regions of interest used in the connectivity analysis<sup>a</sup>**

| Region                                               | Component <sup>b</sup> | X   | Y   | Z   | Homologue <sup>c</sup> |
|------------------------------------------------------|------------------------|-----|-----|-----|------------------------|
| Gray matter anterior intraparietal sulcus HIP1 right | 1                      | 32  | -60 | 50  | 2                      |
| Gray matter anterior intraparietal sulcus HIP1 left  | 1                      | -24 | -60 | 46  | 1                      |
| Gray matter primary auditory cortex TE1.2 right      | 1                      | 56  | -4  | -10 | 4                      |
| Gray matter primary auditory cortex TE 1.2 left      | 1                      | -56 | -4  | -10 | 3                      |
| Gray matter visual cortex V1 BA17 right              | 2                      | 28  | -96 | -6  | 6                      |
| Gray matter visual cortex V1 BA17 left               | 2                      | -28 | -96 | -6  | 5                      |
| Gray matter Broca area BA44 right                    | 3                      | 44  | 8   | 54  | 8                      |
| Gray matter Broca area BA44 left                     | 3                      | -38 | 16  | 50  | 7                      |
| Gray matter primary motor cortex BA4a right          | 3                      | 52  | -4  | 54  | 10                     |
| Gray matter primary motor cortex BA4a left           | 3                      | -48 | -8  | 50  | 9                      |
| Gray matter premotor cortex BA6 right                | 3                      | 28  | 20  | 58  | 12                     |
| Gray matter premotor cortex BA6 left                 | 3                      | -24 | 20  | 58  | 11                     |
| Gray matter visual cortex V5 right                   | 4                      | 44  | -84 | 10  | 14                     |
| Gray matter visual cortex V5 left                    | 4                      | -36 | -86 | 8   | 13                     |
| Gray matter anterior intraparietal sulcus HIP1 right | 6                      | 52  | -40 | 48  | 16                     |
| Gray matter anterior intraparietal sulcus HIP1 left  | 6                      | -48 | -38 | 42  | 15                     |
| Gray matter anterior intraparietal sulcus HIP2 right | 6                      | 66  | -28 | 30  | 18                     |
| Gray matter anterior intraparietal sulcus HIP2 left  | 6                      | -60 | -32 | 26  | 17                     |
| Gray matter premotor right                           | 6                      | 60  | 8   | 22  | 20                     |
| Gray matter premotor left                            | 6                      | -52 | 4   | 22  | 19                     |
| Gray matter primary motor cortex BA4p right          | 6                      | 62  | -14 | 30  | 22                     |
| Gray matter primary motor cortex BA4p left           | 6                      | -56 | -20 | 30  | 21                     |
| Gray matter visual cortex V5 right                   | 6                      | 52  | -68 | -10 | 24                     |
| Gray matter visual cortex V5 left                    | 6                      | -48 | -68 | -10 | 23                     |
| Gray matter anterior intraparietal sulcus HIP1 right | 8                      | 50  | -60 | 26  | 26                     |
| Gray matter anterior intraparietal sulcus HIP1 left  | 7                      | -48 | -58 | 30  | 25                     |
| Gray matter Broca area BA45 right                    | 8                      | 52  | 22  | -10 | 28                     |
| Gray matter Broca area BA45 left                     | 7                      | -48 | 24  | -10 | 27                     |
| Gray matter amygdala-centromedial group right        | 41                     | 24  | -8  | -18 | 30                     |
| Gray matter amygdala-centromedial group left         | 41                     | -20 | -2  | -20 | 29                     |
| Gray matter anterior intraparietal sulcus HIP1 right | 14                     | 26  | -44 | 44  | 32                     |
| Gray matter anterior intraparietal sulcus HIP1 left  | 14                     | -28 | -42 | 40  | 31                     |
| Gray matter primary motor cortex BA4a right          | 14                     | 10  | -44 | 46  | 34                     |
| Gray matter primary motor cortex BA4a left           | 14                     | -8  | -40 | 46  | 33                     |
| Gray matter amygdala-laterobasal group right         | 13                     | 38  | -2  | -38 | 36                     |
| Gray matter amygdala-laterobasal group left          | 13                     | -38 | -2  | -34 | 35                     |
| Gray matter primary auditory cortex TE1.0 right      | 18                     | 48  | -28 | 10  | 38                     |
| Gray matter primary auditory cortex TE1.0 left       | 18                     | -40 | -28 | 6   | 37                     |
| Gray matter primary motor cortex BA4a right          | 19                     | 16  | -24 | 62  | 40                     |
| Gray matter primary motor cortex BA4p left           | 19                     | -16 | -28 | 62  | 39                     |
| Gray matter anterior intraparietal sulcus HIP1 right | 23                     | 52  | -60 | 44  | 42                     |
| Gray matter anterior intraparietal sulcus HIP1 left  | 23                     | -46 | -60 | 46  | 41                     |
| Gray matter primary motor cortex BA4a right          | 24                     | 12  | -16 | 74  | 44                     |
| Gray matter primary motor cortex BA4a left           | 24                     | -8  | -14 | 74  | 43                     |
| Gray matter primary motor cortex BA4p right          | 24                     | 32  | -28 | 70  | 46                     |
| Gray matter primary motor cortex BA4p left           | 24                     | -28 | -28 | 70  | 45                     |
| Gray matter primary somatosensory cortex BA3a right  | 24                     | 8   | -34 | 70  | 48                     |
| Gray matter primary somatosensory cortex BA3a left   | 24                     | -8  | -38 | 70  | 47                     |
| Gray matter primary auditory cortex TE1.0 right      | 25                     | 64  | -24 | 6   | 50                     |
| Gray matter primary auditory cortex TE1.0 left       | 25                     | -60 | -28 | 6   | 49                     |
| Gray matter Broca area BA45 right                    | 31                     | 48  | 38  | 16  | 52                     |
| Gray matter Broca area BA44 left                     | 31                     | -40 | 38  | 22  | 51                     |
| Gray matter hippocampus cornu ammonis right          | 32                     | 32  | -40 | -16 | 54                     |
| Gray matter hippocampus cornu ammonis left           | 32                     | -28 | -44 | -14 | 53                     |
| Gray matter anterior intraparietal sulcus HIP2 right | 38                     | 20  | -58 | 22  | 56                     |
| Gray matter anterior intraparietal sulcus HIP1 left  | 38                     | -16 | -60 | 22  | 55                     |
| Gray matter primary somatosensory cortex BA3a right  | 40                     | 12  | -52 | 68  | 58                     |
| Gray matter primary somatosensory cortex BA3a left   | 40                     | -8  | -54 | 62  | 57                     |
| Gray matter visual cortex V5 right                   | 66                     | 50  | -64 | 8   | 60                     |
| Gray matter visual cortex V5 left                    | 66                     | -50 | -64 | 8   | 59                     |
| Frontal Pole                                         | 54                     | 0   | 64  | 18  |                        |
| Superior frontal gyrus                               | 54                     | 0   | 40  | 50  |                        |
| Frontal medial cortex                                | 54                     | 4   | 55  | -10 |                        |
| Gray matter visual cortex V1 BA17                    | 63                     | -2  | -80 | 34  |                        |

<sup>a</sup> Coordinates are adapted from Kiviniemi et al.<sup>32</sup><sup>b</sup> The independent component to which the coordinate is localized.<sup>c</sup> The region that is the interhemispheric homologue to a given region.

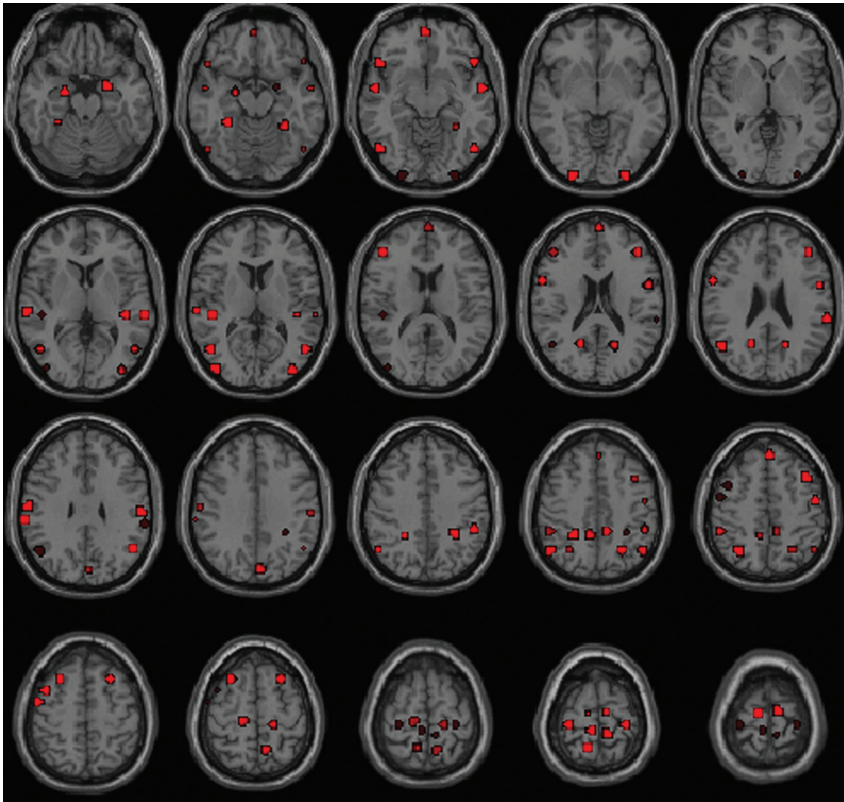

**On-line Fig 1.** Graphic illustration of 64 ROIs from On-line Table 1 used for connectivity analysis.
